# Supplementary material
Source: Springer Nature journal article supplement (https://www.springermedizin.de/resource/supplementary/12978_2011_111_MOESM3_ESM.pdf/9602886)
Supplement: MOESM3 [file 9602886]

'Ever-married women'

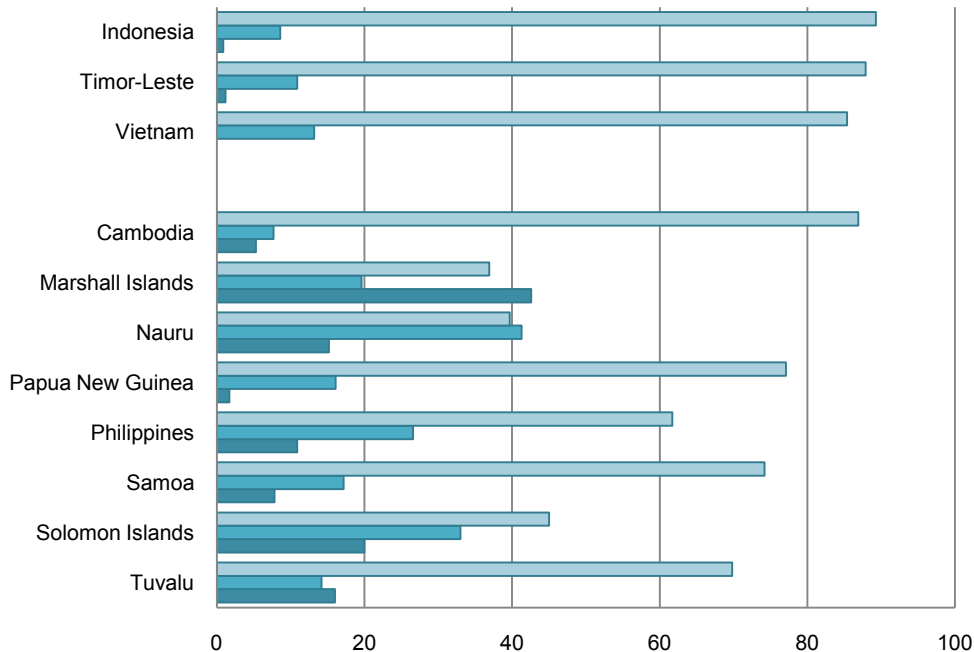

'All women'

■ % pregnancies intended    ■ % pregnancies wanted later    ■ % pregnancies unwanted
